# Supplementary material for: Integrating LAMP-coupled Modification SPCE with SiNWs/PtNPs in an Electrochemical DNA Biosensor for Real-time Monitoring of Porcine DNA Amplification
Source: Research Square preprint supplement (doi:10.21203/rs.3.rs-7079194/v1), 2025-07-18
Supplement: Supplementary file 1 [file 048caf59420f969499da7a70.docx]

**Supplementary File**


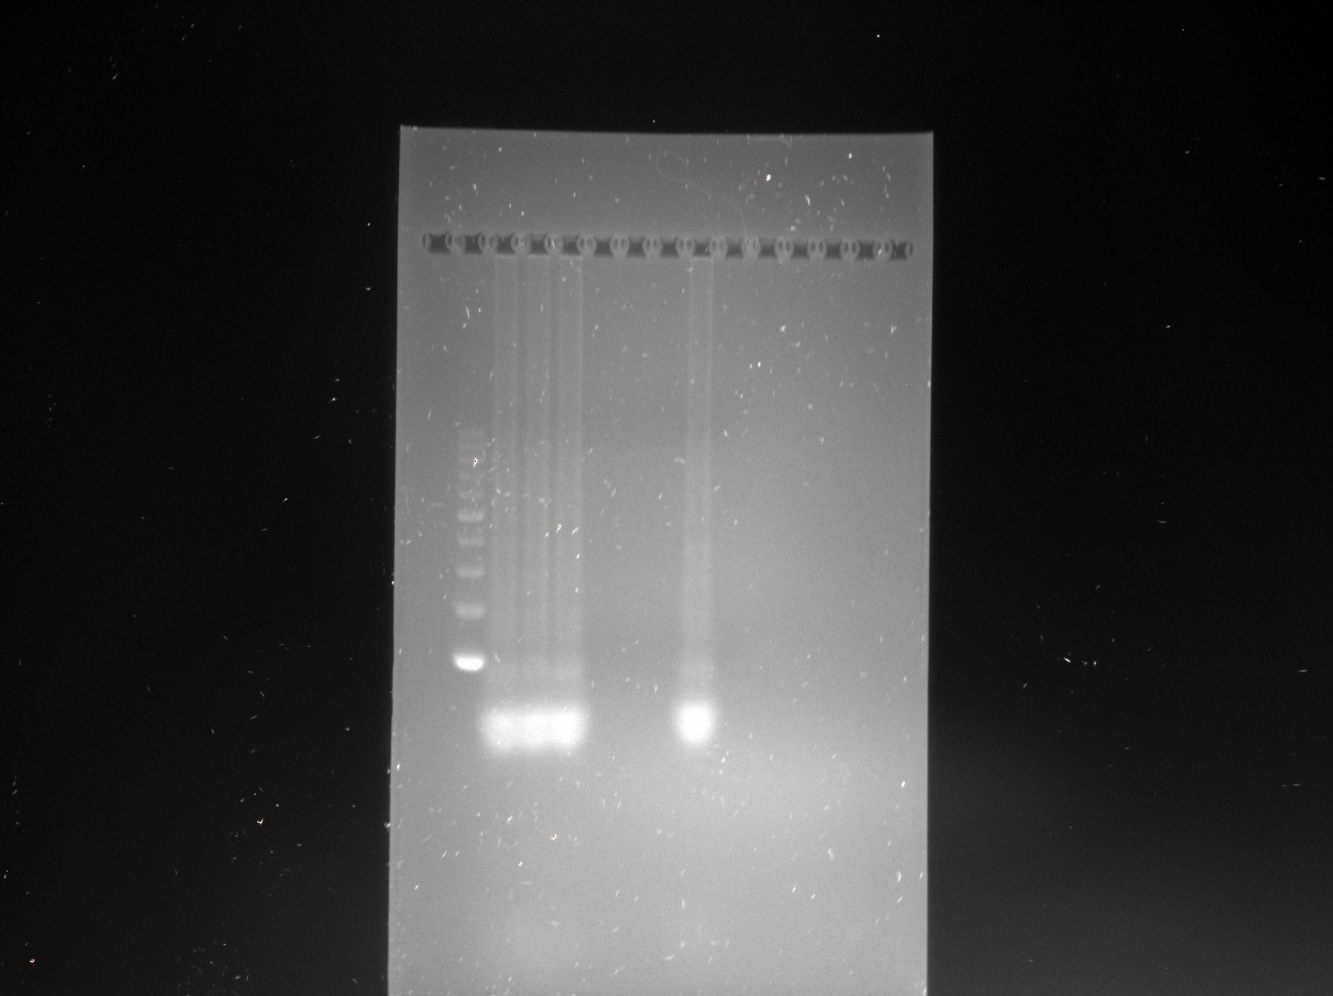


M S1 S2 S3 S4 S5 S6 C1 C2

**Fig. S1** Uncropped agarose gel image showing LAMP-amplified products derived from various sample types, including raw pork, pork sausage, canned pork, raw beef, raw lamb, and raw chicken (labelled S1 to S6). A synthetic porcine oligonucleotide served as the positive control (C1), while a no template reaction was used as the negative control (C2). Each reaction used 1 µg of extracted DNA. M indicated the 100 bp molecular weight marker.
